# Supplementary material for: Non-coding roX RNAs Prevent the Binding of the MSL-complex to Heterochromatic Regions
Source: PubMed Central journal article supplement (PMC4263465; doi:10.1371/journal.pgen.1004865), 2014-12-11

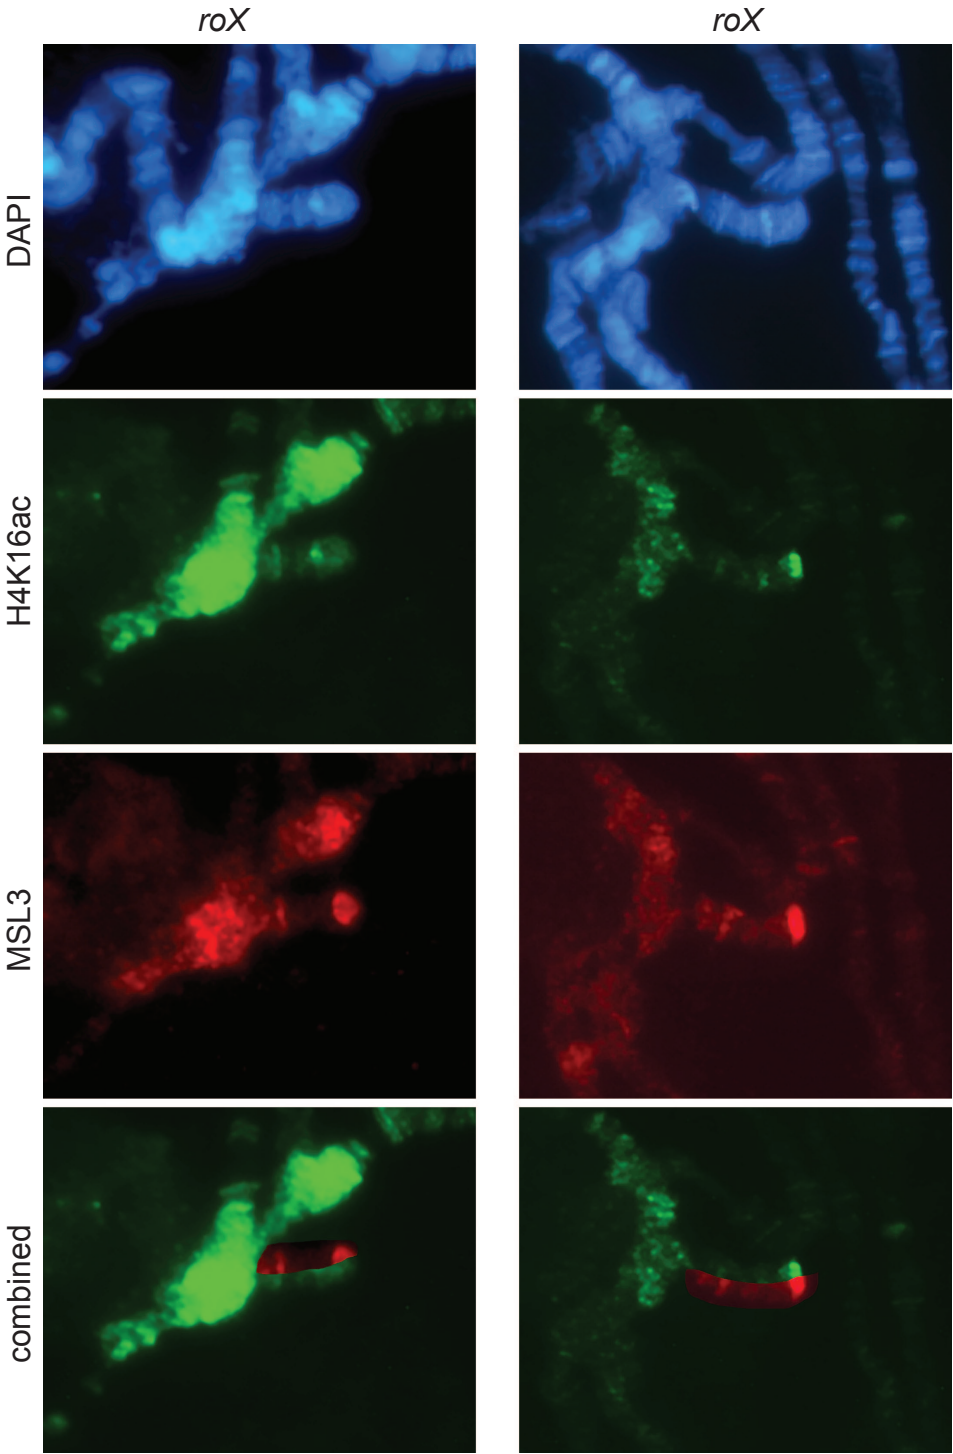

Supplement: pgen.1004865.s001.pdf [file pgen.1004865.s001.pdf]
