# Supplementary material for: Non-coding roX RNAs Prevent the Binding of the MSL-complex to Heterochromatic Regions
Source: PubMed Central journal article supplement (PMC4263465; doi:10.1371/journal.pgen.1004865), 2014-12-11
Supplement: pgen.1004865.s005.pdf [file pgen.1004865.s005.pdf]

Supplementary Table S1

|                | Sense                        | Antisense                     |
|----------------|------------------------------|-------------------------------|
| <i>Ankyrin</i> | 5'-GGTGTTCCTCCGCGTATTG-3'    | 5'-AGCTAACATTGGCGCAAC-3'      |
| <i>Rad23</i>   | 5'-CAATAGGCTGAATGAATCAACG-3' | 5'-TTTGAAGAACTGTGGCTGG-3'     |
| <i>CG2177</i>  | 5'-ACGTCTTGATGGCTAGTGG-3'    | 5'-TTGGTGGACATCTCTCAGC-3'     |
| <i>PMCA</i>    | 5'-CCATTGGTTCAATAACTTCACG-3' | 5'-CGTCCTAACGGAGGATATCG-3'    |
| <i>Dyrk3</i>   | 5'-ATACGCTGGTTCTCGAAGC-3'    | 5'-CTTTGCTACAATGTTTGGATGC -3' |
| <i>Mitf</i>    | 5'-GCTACCATCATTGACAGC-3'     | 5'-TTGGCTAGGGCATTCAATTC-3'    |
| <i>MED26</i>   | 5'-TCGATGTAGCATCTCCAGATAC-3' | 5'-AAAGAGAAGGACAGGTCGC-3'     |
| <i>RpL32</i>   | 5'-CGATGTTGGGCATCAGATAC-3'   | 5'-CCCAAGATCGTGAAGAAGC-3'     |
